# Supplementary material for: The enhanced efficiency of graphene–silicon solar cells by electric field doping
Source: Royal Society of Chemistry journal article supplement (doi:10.1039/c4nr06677d), 2015-01-01
Supplement: c4nr06677d1.pdf [file c4nr06677d1.pdf]

**Electronic Supplementary Material (ESI) for Nanoscale**  
**This journal is © The Royal Society of Chemistry 2014**

**Supporting Information for**

**Enhanced efficiency of graphene-silicon solar cells by electric field doping**

Xuegong Yu<sup>a</sup>, Lifei Yang<sup>a</sup>, Qingmin Lv<sup>a</sup>, Mingsheng Xu<sup>b,\*</sup>, Hongzheng Chen<sup>b</sup> and Deren Yang<sup>a,\*</sup>

<sup>a</sup>State Key Lab of Silicon Materials, School of Materials Science and Engineering, Zhejiang University  
Hangzhou 310027, P. R. China

<sup>b</sup>State Key Lab of Silicon Materials, Department of Polymer Science and Engineering, Zhejiang University  
Hangzhou 310027, P. R. China

\* E-mail: [msxu@zju.edu.cn](mailto:msxu@zju.edu.cn); [mseyang@zju.edu.cn](mailto:mseyang@zju.edu.cn)

In our experiment, The P(VDF-TrFE) layer had been optimized in terms of the coverage rate of the P(VDF-TrFE) crystalline grain on the Si substrate by controlling the concentration of the P(VDF-TrFE) solution used for spin-coating. As shown in **Figure S1**, the P(VDF-TrFE) layer obtained by applying 0.02 wt% P(VDF-TrFE) solution contains crystalline grains with diameter of ~200nm and height of ~15 nm, covering 10-20% of the Si substrate. As the P(VDF-TrFE) solution increasing to 0.2wt%, the P(VDF-TrFE) layer consists of rod-like crystalline grains with length of ~200 nm and height of ~15 nm, covering 30-40% of the Si substrate. As the P(VDF-TrFE) solution increasing further to 2wt%, the rod crystalline grains grown longer, but the height of the gain is still ~15 nm, covering 70-80% of the Si substrate. **Table S1** shows the performance of Gr-P(VDF-TrFE)-Si solar cells integrating different kind of P(VDF-TrFE) interlayer before and after polarization. It is found that Gr-P(VDF-TrFE)/0.02wt%-Si solar cell has the highest original efficiency, but its improvement after polarization is much less (relative 6% gain) due to the low electric field doping effect. On the other hand, the Gr-P(VDF-TrFE)/2wt%-Si solar cell has higher efficiency improvement (relative 20% gain) after polarization, but its original efficiency is too low. The Gr-P(VDF-TrFE)/0.2wt%-Si solar cell, in our experiment, performs most effective to polarization and has the highest efficiency after polarization.

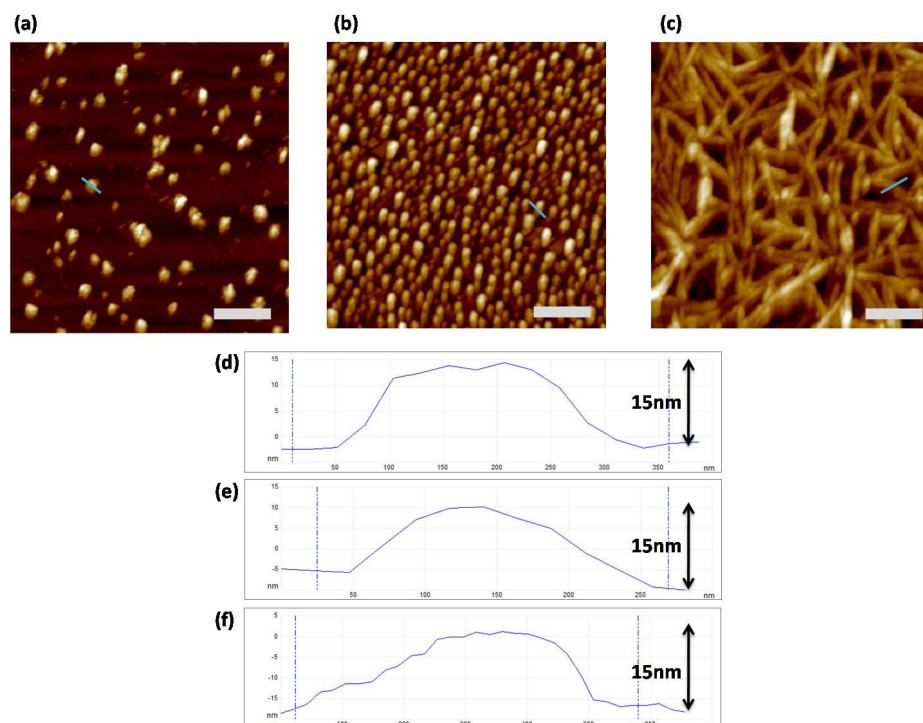

**Figure S1** AFM images of crystallized P(VDF-TrFE) film obtained by spin coating P(VDF-TrFE) solution with different concentration: (a) 0.02wt%, (b) 0.2wt%, (c) 2wt%. The height profile of the P(VDF-TrFE) crystalline grain along the blue line: (d) 0.02wt%, (e) 0.2wt%, (f) 2wt%. Scale bars represent 1 $\mu$ m.

**Table S1** Photovoltaic parameters of Gr-P(VDF-TrFE)-Si solar cells integrating different kind of P(VDF-TrFE) interlayer before and after polarization.

| P(VDF-TrFE) | $V_p$<br>(V) | $V_{OC}$<br>(V) | $J_{SC}$<br>(mA·cm <sup>-2</sup> ) | $FF$ | $\eta$<br>(%) |
|-------------|--------------|-----------------|------------------------------------|------|---------------|
| 0.02wt%     | 0            | 0.45            | 26.0                               | 0.30 | 3.51          |
|             | 4            | 0.46            | 26.3                               | 0.31 | 3.75          |
| 0.2wt%      | 0            | 0.45            | 14.8                               | 0.30 | 2.01          |
|             | 4            | 0.50            | 21.2                               | 0.39 | 4.13          |
| 2wt%        | 0            | 0.42            | 4.60                               | 0.26 | 0.50          |
|             | 4            | 0.47            | 5.30                               | 0.26 | 0.65          |

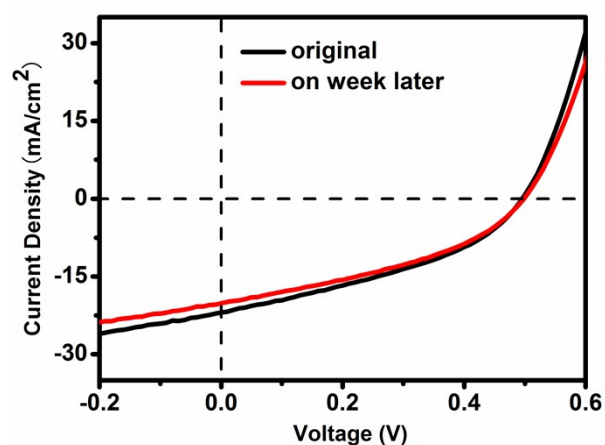

**Figure S2** Illuminated current density-voltage ( $J$ - $V$ ) curves of the polarized Gr-P(VDF-TrFE)-Si solar cell at original and after one week storing.
